# Supplementary material for: Reformation of the chondroitin sulfate glycocalyx enables progression of AR-independent prostate cancer
Source: PubMed Central journal article supplement (PMC9376089; doi:10.1038/s41467-022-32530-7), 2022-08-13
Supplement: 41467_2022_32530_MOESM2_ESM.pdf [file 41467_2022_32530_MOESM2_ESM.pdf]

## Reporting Summary

Nature Portfolio wishes to improve the reproducibility of the work that we publish. This form provides structure for consistency and transparency in reporting. For further information on Nature Portfolio policies, see our [Editorial Policies](#) and the [Editorial Policy Checklist](#).

### Statistics

For all statistical analyses, confirm that the following items are present in the figure legend, table legend, main text, or Methods section.

n/a Confirmed

- The exact sample size ( $n$ ) for each experimental group/condition, given as a discrete number and unit of measurement
- A statement on whether measurements were taken from distinct samples or whether the same sample was measured repeatedly
- The statistical test(s) used AND whether they are one- or two-sided  
*Only common tests should be described solely by name; describe more complex techniques in the Methods section.*
- A description of all covariates tested
- A description of any assumptions or corrections, such as tests of normality and adjustment for multiple comparisons
- A full description of the statistical parameters including central tendency (e.g. means) or other basic estimates (e.g. regression coefficient) AND variation (e.g. standard deviation) or associated estimates of uncertainty (e.g. confidence intervals)
- For null hypothesis testing, the test statistic (e.g.  $F$ ,  $t$ ,  $r$ ) with confidence intervals, effect sizes, degrees of freedom and  $P$  value noted  
*Give  $P$  values as exact values whenever suitable.*
- For Bayesian analysis, information on the choice of priors and Markov chain Monte Carlo settings
- For hierarchical and complex designs, identification of the appropriate level for tests and full reporting of outcomes
- Estimates of effect sizes (e.g. Cohen's  $d$ , Pearson's  $r$ ), indicating how they were calculated

*Our web collection on [statistics for biologists](#) contains articles on many of the points above.*

### Software and code

Policy information about [availability of computer code](#)

Data collection

Living Image 4.7.3 (Perkin elmer) was used for bioluminescence data collection. BD FACSDiva for flow cytometry acquisition. Incucyte Chemotaxis software.

Data analysis

All statistical analysis were performed on Graphpad Prism and Excel. Bioluminescence Live imaging analysis was performed on Living Image 4.7.3 (Perkin elmer). FlowJo (v9) and Cyflogic (1.2.1) for FACS analysis. Carl Zeiss (zen) for confocal microscopy analysis. Incucyte chemotaxis software.

For manuscripts utilizing custom algorithms or software that are central to the research but not yet described in published literature, software must be made available to editors and reviewers. We strongly encourage code deposition in a community repository (e.g. GitHub). See the Nature Portfolio [guidelines for submitting code & software](#) for further information.

### Data

Policy information about [availability of data](#)

All manuscripts must include a [data availability statement](#). This statement should provide the following information, where applicable:

- Accession codes, unique identifiers, or web links for publicly available datasets
- A description of any restrictions on data availability
- For clinical datasets or third party data, please ensure that the statement adheres to our [policy](#)

Previously published RNA-seq data that were re-analyzed here are available under accession code <https://www.ncbi.nlm.nih.gov/geo/query/acc.cgi?acc=GSE147250>; <https://www.ncbi.nlm.nih.gov/geo/query/acc.cgi?acc=GSE59986>. The Chip-SEQ data reanalyzed here were obtained from Cistrome.com; WashU Epigenome Browser using data from Chen et al., 2015; Chng et al., 2012. Source Data are provided with this paper. All other data supporting the findings of this study are available in the Source Data file and from the corresponding author on reasonable request.

## Field-specific reporting

Please select the one below that is the best fit for your research. If you are not sure, read the appropriate sections before making your selection.

Life sciences  Behavioural & social sciences  Ecological, evolutionary & environmental sciences

For a reference copy of the document with all sections, see [nature.com/documents/nr-reporting-summary-flat.pdf](https://www.nature.com/documents/nr-reporting-summary-flat.pdf)

## Life sciences study design

All studies must disclose on these points even when the disclosure is negative.

|                 |                                                                                                                                                                                                                                                                                               |
|-----------------|-----------------------------------------------------------------------------------------------------------------------------------------------------------------------------------------------------------------------------------------------------------------------------------------------|
| Sample size     | For Immunofluorescence analysis the number of samples was determined by a power analysis. The sample sizes were chosen based on standard numbers for most biological studies. Experiments were performed at least as biological triplicates. For patients data, all available data were used. |
| Data exclusions | No samples were excluded from analysis in this study.                                                                                                                                                                                                                                         |
| Replication     | A detailed protocol is generated for each experiment. Experiments were replicated successfully three times when applicable or it is indicated otherwise.                                                                                                                                      |
| Randomization   | Randomization was applied for all in vivo experiments. For in vitro experiments samples allocation was random.                                                                                                                                                                                |
| Blinding        | Investigators were blinded to allocation during data collection and data analysis when applicable.                                                                                                                                                                                            |

## Reporting for specific materials, systems and methods

We require information from authors about some types of materials, experimental systems and methods used in many studies. Here, indicate whether each material, system or method listed is relevant to your study. If you are not sure if a list item applies to your research, read the appropriate section before selecting a response.

### Materials & experimental systems

### Methods

| n/a                                 | Involved in the study                                           | n/a                                 | Involved in the study                              |
|-------------------------------------|-----------------------------------------------------------------|-------------------------------------|----------------------------------------------------|
| <input type="checkbox"/>            | <input checked="" type="checkbox"/> Antibodies                  | <input checked="" type="checkbox"/> | <input type="checkbox"/> ChIP-seq                  |
| <input type="checkbox"/>            | <input checked="" type="checkbox"/> Eukaryotic cell lines       | <input type="checkbox"/>            | <input checked="" type="checkbox"/> Flow cytometry |
| <input checked="" type="checkbox"/> | <input type="checkbox"/> Palaeontology and archaeology          | <input checked="" type="checkbox"/> | <input type="checkbox"/> MRI-based neuroimaging    |
| <input type="checkbox"/>            | <input checked="" type="checkbox"/> Animals and other organisms |                                     |                                                    |
| <input checked="" type="checkbox"/> | <input type="checkbox"/> Human research participants            |                                     |                                                    |
| <input type="checkbox"/>            | <input checked="" type="checkbox"/> Clinical data               |                                     |                                                    |
| <input checked="" type="checkbox"/> | <input type="checkbox"/> Dual use research of concern           |                                     |                                                    |

## Antibodies

|                 |                                                                                                                                                                                                                                                                                                                                                                                                                                                                                                                                                                                                                                                                                                                                                                                                                                                                                                                                                                                                                                                                                                                     |
|-----------------|---------------------------------------------------------------------------------------------------------------------------------------------------------------------------------------------------------------------------------------------------------------------------------------------------------------------------------------------------------------------------------------------------------------------------------------------------------------------------------------------------------------------------------------------------------------------------------------------------------------------------------------------------------------------------------------------------------------------------------------------------------------------------------------------------------------------------------------------------------------------------------------------------------------------------------------------------------------------------------------------------------------------------------------------------------------------------------------------------------------------|
| Antibodies used | All antibodies used in this study, their catalogue number, applications and dilutions are listed in Source Data File table 1.<br>Rabbit anti-AR Cell Signaling Cat #5153<br>Mouse anti-chABC 1E10 Novus Biologicals Cat#NBP1-96141<br>Mouse anti-CHST11 Millipore Sigma Cat#WH0050515M1<br>Rabbit anti-PSA Cell Signaling Cat#C5365<br>Rabbit anti-GAPDH Cell Signaling Cat# 51745<br>Mouse anti-Vinculin Abcam Cat# ab130007<br>Mouse anti-β-Actin Sigma Cat# A2228<br>Mouse anti-V5 Sigma Cat# R96025<br>Rabbit anti-HOXB13 Cell Signaling Cat# 90944S<br>Rabbit IgG Diagenode Cat# C15410206<br>Rabbit anti Syndecan-1 Cell Signaling Cat#12922s<br>Mouse anti TMEFF2 GeneTex Cat#GTX50037<br>Mouse anti CD44 Novus Biologicals Cat# BBA10<br>Donkey anti-mouse 680/800 LI-COR RRID:AB_10706167<br>RRID:AB_2715510<br>Donkey anti-rabbit 680/800 LI-COR RRID:AB_10715072/RRID:AB_2716622<br>Donkey anti-mouse 488/594 Thermo Fisher RRID:AB_141607/RRID:AB_2535789<br>Donkey anti-rabbit 488/594 Thermo Fisher RRID:AB_2535792/RRID:AB_141637<br>Rabbit anti-rat IgG ImmunoResearch Laboratories Cat#312-005-045 |
| Validation      | CHST11 antibody was validated by the manufacturer and further validated in our lab in LNCaP and PC3 cells using a set of 3 different                                                                                                                                                                                                                                                                                                                                                                                                                                                                                                                                                                                                                                                                                                                                                                                                                                                                                                                                                                                |

## Validation

CHST11 siRNAs. The other antibodies were validated by the manufacturer as indicated in the data sheets of the suppliers and they were cited in multiple peer reviewed publications. Please see below for application used in this study and species reactivity

Rabbit anti-AR Cell Signaling; #5153; Application (W.B); Reactivity (Human)

Mouse anti-chABC Novus Biologicals ; #NBP1-96141; Application (W.B); Reactivity (Non-species specific); chABC is exogenous protein. The antibody was validated in the present study by W.B, IF and IHC. Parental cell lines and tumors that are negative for ChABC were used as negative control for specificity validation.

Mouse anti-CHST11 Millipore Sigma #WH0050515M1; Application (W.B); Reactivity (human, rat, mouse)

Rabbit anti-PSA Cell Signaling #C5365; Application (W.B); Reactivity (Human)

Rabbit anti-GAPDH Cell Signaling Cat# 51745; Application (W.B); Reactivity (human, rat, mouse, monkey)

Mouse anti-Vinculin Abcam Cat# ab130007; Application (W.B); Reactivity (human, rat, mouse, African green monkey)

Mouse anti- $\beta$ -Actin Sigma Cat# A2228; Application (W.B); Reactivity (Drosophila, Hirudo medicinalis, carp, rabbit, wide range, pig, cat, human, rat, chicken, guinea pig, sheep, mouse, bovine, canine)

Mouse anti-V5 Sigma Cat# R96025; Application (W.B; IF); Reactivity (Tag)

Rabbit anti-HOXB13 Cell Signaling Cat# 90944S; Application (W.B; IHC); Reactivity (human, monkey)

Rabbit anti Syndecin-1 Cell Signaling Cat#12922s; Application (W.B); Reactivity (human)

Mouse anti TMEFF2 GeneTex Cat#GTX50037; Application (W.B); Reactivity (mouse, human)

Mouse anti CD44 Novus Biologicals Cat# BBA10; Application (W.B); Reactivity (human)

## Eukaryotic cell lines

### Policy information about [cell lines](#)

|                                                                   |                                                                                                                                                                                                      |
|-------------------------------------------------------------------|------------------------------------------------------------------------------------------------------------------------------------------------------------------------------------------------------|
| Cell line source(s)                                               | HEK293T,NCIH660, LNCaP, PC3, VCaP, DU145, 22RV1 Cell lines were obtained from ATCC. IGR-CaP1 was obtained from Dr. Anne Chauchereau. 42D and V16D cells were obtained from Dr. Martin E. Gleave lab. |
| Authentication                                                    | LNCaP, PC3 and DU145 Cell line authentication testing was performed (STR profiling). VCaP and IGR-CaP1 were used just after acquired from original source.                                           |
| Mycoplasma contamination                                          | All cells were tested for mycoplasma regularly and were negative.                                                                                                                                    |
| Commonly misidentified lines (See <a href="#">ICLAC</a> register) | No commonly misidentified cell lines are used in this study                                                                                                                                          |

## Animals and other organisms

### Policy information about [studies involving animals](#); [ARRIVE guidelines](#) recommended for reporting animal research

|                         |                                                                                                                                                                                                                                                                                                                                                                                      |
|-------------------------|--------------------------------------------------------------------------------------------------------------------------------------------------------------------------------------------------------------------------------------------------------------------------------------------------------------------------------------------------------------------------------------|
| Laboratory animals      | Athymic Nu/Nu Male mice age 6-8 weeks from Jackson laboratory.                                                                                                                                                                                                                                                                                                                       |
| Wild animals            | The study did not involve any wild animals.                                                                                                                                                                                                                                                                                                                                          |
| Field-collected samples | The study did not involve samples collected from the field.                                                                                                                                                                                                                                                                                                                          |
| Ethics oversight        | All animal studies were performed in accordance with protocols approved by the Animal Care Committee at the University of British Columbia (A19-0324). Mice were maintained in ventilated cages (4 mice per cage), with constant humidity (25–47%) and temperature (21–22 °C), under a 12 h:12 h light:dark cycle, and had ad libitum access to rodent chow diet and drinking water. |

Note that full information on the approval of the study protocol must also be provided in the manuscript.

## Clinical data

### Policy information about [clinical studies](#)

All manuscripts should comply with the ICMJE [guidelines for publication of clinical research](#) and a completed [CONSORT checklist](#) must be included with all submissions.

|                             |                                                                                                                          |
|-----------------------------|--------------------------------------------------------------------------------------------------------------------------|
| Clinical trial registration | <i>Provide the trial registration number from ClinicalTrials.gov or an equivalent agency.</i>                            |
| Study protocol              | <i>Note where the full trial protocol can be accessed OR if not available, explain why.</i>                              |
| Data collection             | <i>Describe the settings and locales of data collection, noting the time periods of recruitment and data collection.</i> |
| Outcomes                    | <i>Describe how you pre-defined primary and secondary outcome measures and how you assessed these measures.</i>          |

### Plots

Confirm that:

- The axis labels state the marker and fluorochrome used (e.g. CD4-FITC).
- The axis scales are clearly visible. Include numbers along axes only for bottom left plot of group (a 'group' is an analysis of identical markers).
- All plots are contour plots with outliers or pseudocolor plots.
- A numerical value for number of cells or percentage (with statistics) is provided.

### Methodology

Sample preparation

Cells were grown to 70%–80% confluency in appropriate growth media and harvested in CellStripper. Cells were incubated with rVAR2 protein (200–25 nM) in PBS containing 2% fetal bovine serum (FBS) for 30 min at 4°C and binding was analyzed after a secondary incubation with an anti-V5-FITC antibody.

Instrument

FACSCanto II (BD Biosciences)

Software

BD FACSDiva for acquisition and FlowJo and Cyflogic for analysis

Cell population abundance

10,000 gated events were acquired

Gating strategy

FSC/SSC for single cell population gating was used for live cell gating

- Tick this box to confirm that a figure exemplifying the gating strategy is provided in the Supplementary Information.
